# Supplementary material
Source: MDPI journal article supplement (https://www.mdpi.com/2673-4834/3/4/63)
Supplement: s1 [file s1]

**Table S1:** Modified Preferred Reporting Items for Systematic Reviews and Meta-Analysis (PRISMA) indicating the number of studies considered at each step of the literature search.

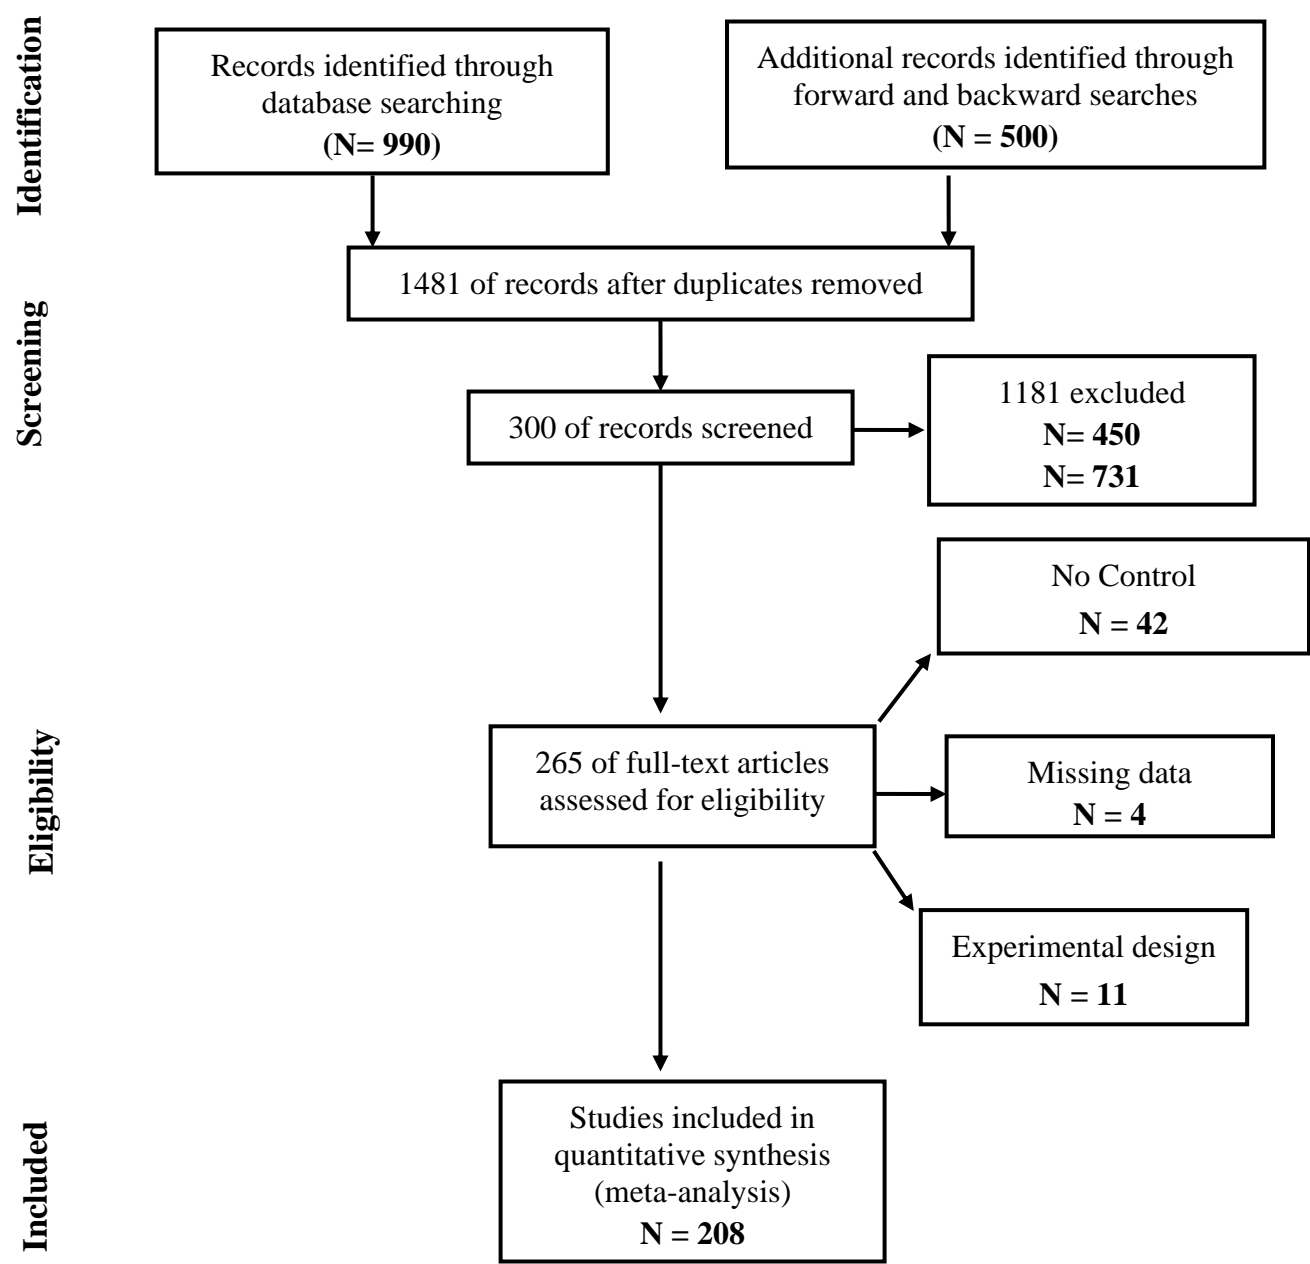

**Table S2:** Overall effect of fire on abundance, biomass, diversity, evenness and richness of all faunal groups and aboveground animals. Analyses were conducted using a mixed-effects model. Hedges'g values of less than 0.2 represent small effects, values between 0.2 and 0.5 represent moderate effects, with values greater than 0.5 suggesting large effects.

| Response                          | estimate | se     | p      | ci.lb   | ci.ub   |
|-----------------------------------|----------|--------|--------|---------|---------|
| <b>Overall Community Response</b> |          |        |        |         |         |
| Abundance                         | -0.3175  | 0.0122 | <.0001 | -0.3415 | -0.2936 |
| Biomass                           | -0.3839  | 0.0266 | <.0001 | -0.4361 | -0.3317 |
| Diversity                         | -0.4228  | 0.0319 | <.0001 | -0.4853 | -0.3604 |
| Evenness                          | -0.2469  | 0.0356 | <.0001 | -0.3167 | -0.1771 |
| Richness                          | -0.2125  | 0.0248 | <.0001 | -0.2611 | -0.1639 |
| <b>Amphibian</b>                  |          |        |        |         |         |
| Abundance                         | 0.83     | 0.25   | 0.00   | 0.35    | 1.32    |
| Richness                          | 1.29     | 0.49   | 0.01   | 0.33    | 2.25    |
| <b>Small mammals</b>              |          |        |        |         |         |
| Abundance                         | 0.0323   | 0.0559 | 0.5637 | -0.0773 | 0.1419  |
| Richness                          | -0.5342  | 0.2988 | 0.0738 | -1.1197 | 0.0514  |
| <b>Birds</b>                      |          |        |        |         |         |
| Abundance                         | 0.38     | 0.12   | 0      | 0.15    | 0.62    |
| Biomass                           | -0.7     | 0.45   | 0.12   | -1.58   | 0.19    |
| Diversity                         | 0.16     | 0.34   | 0.64   | -0.5    | 0.82    |
| Richness                          | 0.86     | 0.36   | 0.02   | 0.16    | 1.57    |
| <b>Arthropods - Aboveground</b>   |          |        |        |         |         |
| Abundance                         | -0.12    | 0.02   | <.0001 | -0.16   | -0.08   |
| Biomass                           | 0.03     | 0.13   | 0.7966 | -0.22   | 0.29    |
| Diversity                         | -0.08    | 0.06   | 0.1613 | -0.2    | 0.03    |
| Evenness                          | 0.34     | 0.09   | 0.0002 | 0.16    | 0.51    |
| Richness                          | 0.17     | 0.04   | <.0001 | 0.1     | 0.24    |
| <b>Reptiles</b>                   |          |        |        |         |         |
| Abundance                         | 0.04     | 0.09   | 0.62   | -0.13   | 0.22    |
| Diversity                         | -0.43    | 0.52   | 0.41   | -1.45   | 0.59    |
| Richness                          | 0.36     | 0.15   | 0.02   | 0.07    | 0.65    |
| <b>Molluscs</b>                   |          |        |        |         |         |
| Abundance                         | -0.68    | 0.1887 | 0.0003 | -1.0498 | -0.3102 |
| Richness                          | -0.8763  | 0.2158 | <.0001 | -1.2993 | -0.4533 |

**Table S3:** Overall effect of fire on abundance, biomass, diversity, evenness and richness of all faunal groups and belowground animals. Analyses were conducted using a mixed-effects model. Hedges'g values of less than 0.2 represent small effects, values between 0.2 and 0.5 represent moderate effects, with values greater than 0.5 suggesting large effects.

| <b>Response</b>   | <b>estimate</b> | <b>se</b> | <b>p</b> | <b>ci.lb</b> | <b>ci.ub</b> |
|-------------------|-----------------|-----------|----------|--------------|--------------|
| <b>Annelids</b>   |                 |           |          |              |              |
| Abundance         | -0.92           | 0.24      | 0        | -1.4         | -0.44        |
| Richness          | -0.62           | 0.26      | 0.02     | -1.13        | -0.11        |
| <b>Fungi</b>      |                 |           |          |              |              |
| Abundance         | -0.2897         | 0.0294    | <.0001   | -0.3472      | -0.2321      |
| Biomass           | -0.3447         | 0.0591    | <.0001   | -0.4605      | -0.2289      |
| Diversity         | -0.5796         | 0.0422    | <.0001   | -0.6623      | -0.4969      |
| Evenness          | -0.2708         | 0.0423    | <.0001   | -0.3536      | -0.1879      |
| Richness          | -0.5823         | 0.0429    | <.0001   | -0.6664      | -0.4982      |
| <b>Arthropods</b> |                 |           |          |              |              |
| Abundance         | -0.54           | 0.02      | <.0001   | -0.58        | -0.49        |
| Diversity         | -0.69           | 0.12      | <.0001   | -0.92        | -0.45        |
| Evenness          | -1.01           | 0.12      | <.0001   | -1.25        | -0.78        |
| Richness          | -0.85           | 0.08      | <.0001   | -1           | -0.7         |
| <b>Microbes</b>   |                 |           |          |              |              |
| Abundance         | 0.1587          | 0.1245    | 0.2023   | -0.0853      | 0.4027       |
| Biomass           | -0.4311         | 0.0327    | <.0001   | -0.4952      | -0.3671      |
| Diversity         | 0.1535          | 0.24      | 0.5225   | -0.3169      | 0.6238       |
| Evenness          | -0.7925         | 0.6273    | 0.2065   | -2.022       | 0.437        |
| Richness          | 1.6378          | 0.3671    | <.0001   | 0.9183       | 2.3573       |
| <b>Bacteria</b>   |                 |           |          |              |              |
| Abundance         | -0.96           | 0.05      | < 0001   | -1.06        | -0.86        |
| Biomass           | -0.34           | 0.09      | 0        | -0.52        | -0.16        |
| Diversity         | -0.44           | 0.19      | 0.02     | -0.81        | -0.07        |
| Evenness          | -0.45           | 0.18      | 0.01     | -0.79        | -0.1         |
| Richness          | -0.18           | 0.13      | 0.18     | -0.44        | 0.08         |
| <b>Nematodes</b>  |                 |           |          |              |              |
| Abundance         | -0.6995         | 0.05      | <.0001   | -0.7975      | -0.6016      |
| Biomass           | 0.6628          | 0.4608    | 0.1503   | -0.2403      | 1.5659       |
| Diversity         | -1.2991         | 0.3689    | 0.0004   | -2.0222      | -0.576       |
| Richness          | -1.4303         | 0.4876    | 0.0034   | -2.386       | -0.4746      |

**Table S4:** Overall effect of fire by intensity and habitat on fauna. Analyses were conducted using a mixed-effects model. Hedges'g values of less than 0.2 represent small effects, values between 0.2 and 0.5 represent moderate effects, with values greater than 0.5 suggesting large effects.

| <b>Response</b>       | <b>estimate</b> | <b>se</b> | <b>pval</b> | <b>ci.lb</b> | <b>ci.ub</b> |            |
|-----------------------|-----------------|-----------|-------------|--------------|--------------|------------|
| <b>Microhabitat</b>   |                 |           |             |              |              |            |
| Aboveground           | -0.0267         | 0.0151    | 0.0779      | -0.0563      | 0.003        |            |
| Belowground           | -0.4908         | 0.0118    | <.0001      | -0.514       | -0.4676      |            |
| <b>Fire intensity</b> |                 |           |             |              |              |            |
| Light                 | -0.1207         | 0.0306    | <.0001      | -0.1806      | -0.0608      |            |
| Moderate              | -0.0143         | 0.042     | 0.7341      | -0.0965      | 0.068        |            |
| Severe                | -0.2731         | 0.0308    | <.0001      | -0.3335      | -0.2127      |            |
| <b>Fire types</b>     |                 |           |             |              |              |            |
| Prescribed            | -0.3392         | 0.0147    | <.0001      | -0.3681      | -0.3104      |            |
| Wildfire              | -0.2988         | 0.012     | <.0001      | -0.3224      | -0.2752      |            |
| <b>Biomes</b>         |                 |           |             |              |              |            |
| Agriculture           | -0.7569         | 0.1335    | <.0001      | -1.0187      | -0.4952      | Prescribed |
| Desert                | -4.0618         | 0.4657    | <.0001      | -4.9746      | -3.149       | Prescribed |
| Forest                | -0.4183         | 0.0206    | <.0001      | -0.4587      | -0.3779      | Prescribed |
| Grassland             | -0.1605         | 0.0304    | <.0001      | -0.2202      | -0.1009      | Prescribed |
| Plantation            | -0.4867         | 0.2733    | 0.0749      | -1.0223      | 0.0489       | Prescribed |
| Savannah              | -0.5053         | 0.043     | <.0001      | -0.5897      | -0.421       | Prescribed |
| Shrubland             | -0.1253         | 0.042     | 0.0028      | -0.2076      | -0.043       | Prescribed |
| Tundra                | 0.4889          | 0.4539    | 0.2814      | -0.4006      | 1.3784       | Prescribed |
| Desert                | -0.0777         | 0.1455    | 0.5931      | -0.3629      | 0.2074       | Wildfire   |
| Forest                | -0.4935         | 0.015     | <.0001      | -0.523       | -0.4641      | Wildfire   |
| Grassland             | 0.0805          | 0.0289    | 0.0053      | 0.0239       | 0.1371       | Wildfire   |
| Savannah              | -0.2177         | 0.0874    | 0.0128      | -0.3891      | -0.0463      | Wildfire   |
| Shrubland             | 0.0146          | 0.0366    | 0.6902      | -0.0571      | 0.0863       | Wildfire   |
| Tundra                | 0.1184          | 0.0525    | 0.024       | 0.0156       | 0.2213       | Wildfire   |
| <b>Continent</b>      |                 |           |             |              |              |            |
| Africa                | -0.0281         | 0.0631    | 0.6565      | -0.1517      | 0.0956       | Prescribed |
| Asia                  | -0.6069         | 0.061     | <.0001      | -0.7264      | -0.4873      | Prescribed |
| Australia             | -0.2771         | 0.0547    | <.0001      | -0.3844      | -0.1698      | Prescribed |
| Europe                | -0.5372         | 0.0277    | <.0001      | -0.5914      | -0.4829      | Prescribed |
| North America         | -0.240          | 0.0203    | <.0001      | -0.2799      | -0.2003      | Prescribed |
| South America         | -0.66           | 0.1907    | 0.0005      | -1.0337      | -0.2863      | Prescribed |
| Africa                | 0.0832          | 0.1189    | 0.4842      | -0.1499      | 0.3163       | Wildfire   |
| Asia                  | -0.9748         | 0.0316    | <.0001      | -1.0367      | -0.913       | Wildfire   |
| Australia             | -0.0542         | 0.0941    | 0.5646      | -0.2387      | 0.1303       | Wildfire   |
| Europe                | -0.1428         | 0.0231    | <.0001      | -0.188       | -0.0976      | Wildfire   |
| North America         | -0.0597         | 0.0248    | 0.0159      | -0.1082      | -0.0111      | Wildfire   |

|               |         |        |        |         |        |          |
|---------------|---------|--------|--------|---------|--------|----------|
| South America | -0.3257 | 0.0213 | <.0001 | -0.3674 | -0.284 | Wildfire |
|---------------|---------|--------|--------|---------|--------|----------|

### Papers included in Metanalysis

1. Badejo, M.A. Effect of Accidental Fire on Soil Mite Density in a Forest Reserve in Nigeria. *Experimental & Applied Acarology* **1994**, *18*, 703–710.
2. Čerevková, A.; Renčo, M. Soil Nematode Community Changes Associated with Windfall and Wildfire in Forest Soil at the High Tatras National Park, Slovak Republic. *Helminthologia* **2009**, *46*, 123–130, doi:10.2478/s11687-009-0024-9.
3. Ford, P.L. Biodiversity and Fire in Shortgrass Steppe. *The XIX International Grassland Congress* **2001**, *8*.
4. Ford, P.L. Shared Community Patterns Following Experimental Fire in a Semiarid Grassland. *Proceedings of the 4th International Wildland Fire Conference* **2007**, 1–9.
5. Hutchins, M.W.; Reynolds, B.C.; Patch, S.P. Prescribed Fire and the Abundance of Soil Microarthropods in Northeast Georgia. *Southeastern Naturalist* **2011**, *10*, 489–500, doi:10.1656/058.010.0308.
6. Nagel, H.G. Effect of Spring Prairie Burning on Herbivorous and Non-Herbivorous Arthropod Populations. *Journal of the Kansas Entomological Society* **1973**, *46*, 13.
7. Radea, C.; Arianoutsou, M. Cellulose Decomposition Rates and Soil Arthropod Community in a Pinus Halepensis Mill. Forest of Greece after a Wildfire. *European Journal of Soil Biology* **2000**, *36*, 57–64, doi:10.1016/S1164-5563(00)01045-1.
8. White, K.M. Effects of Fire on a Prairie Arthropod Community, University of Alberta: Lethbridge, Alberta, 2000.
9. Abom, R.; Schwarzkopf, L. Short-Term Responses of Reptile Assemblages to Fire in Native and Weedy Tropical Savannah. *Global Ecology and Conservation* **2016**, *6*, 58–66, doi:10.1016/j.gecco.2016.02.002.
10. Acea, M.J.; Carballas, T. Changes in Physiological Groups of Microorganisms in Soil Following Wildfire. *FEMS Microbiology Ecology* **1996**, *20*, 33–39, doi:10.1111/j.1574-6941.1996.tb00302.x.
11. Akema, T.; Nurhifitni, I.; Suciati; Simbolon, H. The Impact of the 1998 Forest Fire on Ectomycorrhizae of Dipterocarp Trees and Their Recovery in Tropical Rain Forests of East Kalimantan, Indonesia. *JARQ* **2009**, *43*, 137–143, doi:10.6090/jarq.43.137.
12. Aleixo, A.P.; Kaschuk, G.; Alberton, O. Soil Fungal and Bacterial Biomass Determined by Epifluorescence Microscopy and Mycorrhizal Spore Density in Different Sugarcane Managements. *Cienc. Rural* **2014**, *44*, 588–594, doi:10.1590/S0103-84782014000400002.

13. Andersen, A.N.; Müller, W.J. Arthropod Responses to Experimental Fire Regimes in an Australian Tropical Savannah: Ordinal-Level Analysis: ARTHROPOD RESPONSES TO EXPERIMENTAL FIRE REGIMES. *Austral Ecology* **2000**, *25*, 199–209, doi:10.1046/j.1442-9993.2000.01038.x.
14. Anderson, R.C.; Leahy, T.; Dhillon, S.S. Numbers and Biomass of Selected Insect Groups on Burned and Unburned Sand Prairie. *American Midland Naturalist* **1989**, *122*, 151, doi:10.2307/2425692.
15. Andersson, M.; Michelsen, A.; Jensen, M.; Kjølter, A. Tropical Savannah Woodland: Effects of Experimental Fire on Soil Microorganisms and Soil Emissions of Carbon Dioxide. *Soil Biology and Biochemistry* **2004**, *36*, 849–858, doi:10.1016/j.soilbio.2004.01.015.
16. Antunes, S.C.; Curado, N.; Castro, B.B.; Gonçalves, F. Short-Term Recovery of Soil Functional Parameters and Edaphic Macro-Arthropod Community after a Forest Fire. *J Soils Sediments* **2009**, *9*, 267–278, doi:10.1007/s11368-009-0076-y.
17. Apigian, K.O.; Dahlsten, D.L.; Stephens, S.L. Fire and Fire Surrogate Treatment Effects on Leaf Litter Arthropods in a Western Sierra Nevada Mixed-Conifer Forest. *Forest Ecology and Management* **2006**, *221*, 110–122, doi:10.1016/j.foreco.2005.09.009.
18. Atchison, R.A.; Hulcr, J.; Lucky, A. Managed Fire Frequency Significantly Influences the Litter Arthropod Community in Longleaf Pine Flatwoods. *Environmental Entomology* **2018**, *47*, 575–585, doi:10.1093/ee/nvy038.
19. Azevedo, L.C.B.; Morais, M.; Lambais, M.R. Early Changes in Soil Metabolic Diversity and Bacterial Community Structure in Sugarcane under Two Harvest Management Systems. *Rev. Bras. Ciênc. Solo* **2015**, *39*, 701–713, doi:10.1590/01000683rbc20140426.
20. Bååth, E.; Frostegård, Å.; Pennanen, T.; Fritze, H. Microbial Community Structure and PH Response in Relation to Soil Organic Matter Quality in Wood-Ash Fertilized, Clear-Cut or Burned Coniferous Forest Soils. *Soil Biology and Biochemistry* **1995**, *27*, 229–240, doi:10.1016/0038-0717(94)00140-V.
21. Bárcenas-Moreno, G.; García-Orenes, F.; Mataix-Solera, J.; Mataix-Beneyto, J.; Bååth, E. Soil Microbial Recolonisation after a Fire in a Mediterranean Forest. *Biol Fertil Soils* **2011**, *47*, 261–272, doi:10.1007/s00374-010-0532-2.
22. Bárcenas-Moreno, G.; García-Orenes, F.; Mataix-Solera, J.; Mataix-Beneyto, J. Plant Community Influence on Soil Microbial Response after a Wildfire in Sierra Nevada National Park (Spain). *Science of The Total Environment* **2016**, *573*, 1265–1274, doi:10.1016/j.scitotenv.2016.05.013.
23. Barratt, B.I.P.; Tozer, P.A.; Wiedemer, R.L.; Ferguson, C.M.; Johnstone, P.D. Effect of Fire on Microarthropods in New Zealand Indigenous Grassland. *Rangeland Ecology & Management* **2006**, *59*, 383–391, doi:10.2111/05-190R1.1.
24. Barreiro, A.; Martín, A.; Carballas, T.; Díaz-Raviña, M. Response of Soil Microbial Communities to Fire and Fire-Fighting Chemicals. *Science of The Total Environment* **2010**, *408*, 6172–6178, doi:10.1016/j.scitotenv.2010.09.011.

25. Barreiro, A.; Fontúrbel, M.T.; Lombao, A.; Martín, A.; Vega, J.A.; Fernández, C.; Carballas, T.; Díaz-Raviña, M. Using Phospholipid Fatty Acid and Community Level Physiological Profiling Techniques to Characterize Soil Microbial Communities Following an Experimental Fire and Different Stabilization Treatments. *CATENA* **2015**, *135*, 419–429, doi:10.1016/j.catena.2014.07.011.
26. Barreiro, A.; Bååth, E.; Díaz-Raviña, M. Bacterial and Fungal Growth in Burnt Acid Soils Amended with Different High C/N Mulch Materials. *Soil Biology and Biochemistry* **2016**, *97*, 102–111, doi:10.1016/j.soilbio.2016.03.009.
27. Barreiro, A.; Martín, A.; Carballas, T.; Díaz-Raviña, M. Long-Term Response of Soil Microbial Communities to Fire and Fire-Fighting Chemicals. *Biol Fertil Soils* **2016**, *52*, 963–975, doi:10.1007/s00374-016-1133-5.
28. Bellgard, S.E.; Whelan, R.J.; Muston, R.M. The Impact of Wildfire on Vesicular-Arbuscular Mycorrhizal Fungi and Their Potential to Influence the Re-Establishment of Post-Fire Plant Communities. *Mycorrhiza* **1994**, *4*, 139–146, doi:10.1007/BF00203532.
29. Berch, S.M.; Battigelli, J.P.; Hope, G.D. Responses of Soil Mesofauna Communities and Oribatid Mite Species to Site Preparation Treatments in High-Elevation Cutblocks in Southern British Columbia. *Pedobiologia* **2007**, *51*, 23–32, doi:10.1016/j.pedobi.2006.12.001.
30. Beyer, S.; Kinnear, A.; Hutley, L.B.; McGuinness, K.; Gibb, K. Assessing the Relationship between Fire and Grazing on Soil Characteristics and Mite Communities in a Semi-Arid Savanna of Northern Australia. *Pedobiologia* **2011**, *54*, 195–200, doi:10.1016/j.pedobi.2011.03.002.
31. Bliss, G.; Marz, L.; Steenhoeck, S. Forest Fire Has No Significant Effect on Abundance or Diversity of Edaphic Arthropods at CERA. *Tillers* **2012**, *1*, 25–29.
32. Bock, C.E.; Bock, J.H. Response of Grasshoppers (Orthoptera: Acrididae) to Wildfire in a Southeastern Arizona Grassland. *American Midland Naturalist* **1991**, *125*, 162, doi:10.2307/2426379.
33. Bogorodskaya, A.V.; Krasnoshchekova, E.N.; Bezkorovainaya, I.N.; Ivanova, G.A. Post-Fire Transformation of Microbial Communities and Invertebrate Complexes in the Pine Forest Soils, Central Siberia. *Contemp. Probl. Ecol.* **2010**, *3*, 653–659, doi:10.1134/S199542551006007X.
34. Bogorodskaya, A.V.; Kukavskaya, E.A.; Ivanova, G.A. Transformation of Microbial Cenoses in Soils of Light Coniferous Forests Caused by Cuttings and Fires in the Lower Angara River Basin. *Eurasian Soil Sc.* **2014**, *47*, 194–202, doi:10.1134/S1064229314030028.
35. Brennan, K.E.C.; Christie, F.J.; York, A. Global Climate Change and Litter Decomposition: More Frequent Fire Slows Decomposition and Increases the Functional Importance of Invertebrates. *Global Change Biology* **2009**, *15*, 2958–2971, doi:10.1111/j.1365-2486.2009.02011.x.
36. Brown, S.P.; Callaham, M.A.; Oliver, A.K.; Jumpponen, A. Deep Ion Torrent Sequencing Identifies Soil Fungal Community Shifts after Frequent Prescribed Fires in a Southeastern US Forest Ecosystem. *FEMS Microbiol Ecol* **2013**, *86*, 557–566, doi:10.1111/1574-6941.12181.

37. Broza, M.; Izhaki, I. Post-Fire Arthropod Assemblages in Mediterranean Forest Soils in Israel. *Int. J. Wildland Fire* **1997**, *7*, 317, doi:10.1071/WF9970317.
38. Buchalski, M.R.; Fontaine, J.B.; Heady, P.A.; Hayes, J.P.; Frick, W.F. Bat Response to Differing Fire Severity in Mixed-Conifer Forest California, USA. *PLoS ONE* **2013**, *8*, e57884, doi:10.1371/journal.pone.0057884.
39. Buckingham, S.; Murphy, N.; Gibb, H. The Effects of Fire Severity on Macroinvertebrate Detritivores and Leaf Litter Decomposition. *PLoS ONE* **2015**, *10*, e0124556, doi:10.1371/journal.pone.0124556.
40. Buscardo, E.; Rodríguez-Echeverría, S.; Freitas, H.; De Angelis, P.; Pereira, J.S.; Muller, L.A.H. Contrasting Soil Fungal Communities in Mediterranean Pine Forests Subjected to Different Wildfire Frequencies. *Fungal Diversity* **2015**, *70*, 85–99, doi:10.1007/s13225-014-0294-5.
41. Butler, A.; Davis, C.A.; Fuhlendorf, S.D.; Wilder, S.M. Effects of Fire on Ground-dwelling Arthropods in a Shrub-dominated Grassland. *Ecol. Evol.* **2021**, *11*, 427–442, doi:10.1002/ece3.7063.
42. Camann, M.A.; Gillette, N.E.; Lamoncha, K.L.; Mori, S.R. Response of Forest Soil Acari to Prescribed Fire Following Stand Structure Manipulation in the Southern Cascade Range. *Can. J. For. Res.* **2008**, *38*, 956–968, doi:10.1139/X07-241.
43. Campbell, J.W.; Grodsky, S.M.; Keller, O.; Vigueira, C.C.; Vigueira, P.A.; Waite, E.S.; Greenberg, C.H. Response of Beetles (Coleoptera) to Repeated Applications of Prescribed Fire and Other Fuel Reduction Techniques in the Southern Appalachian Mountains. *Forest Ecology and Management* **2018**, *429*, 294–299, doi:10.1016/j.foreco.2018.07.022.
44. Caruso, T.; Migliorini, M. Micro-Arthropod Communities under Human Disturbance: Is Taxonomic Aggregation a Valuable Tool for Detecting Multivariate Change? Evidence from Mediterranean Soil Oribatid Coenoses. *Acta Oecologica* **2006**, *30*, 46–53, doi:10.1016/j.actao.2006.01.003.
45. Cilliers, C.D.; Botha, A.; Esler, K.J.; Boucher, C. Effects of Alien Plant Management, Fire and Soil Chemistry on Selected Soil Microbial Populations in the Table Mountain National Park, South Africa. *South African Journal of Botany* **2005**, *71*, 211–220, doi:10.1016/S0254-6299(15)30135-6.
46. Coleman, T.W.; Rieske, L.K. Arthropod Response to Prescription Burning at the Soil–Litter Interface in Oak–Pine Forests. *Forest Ecology and Management* **2006**, *233*, 52–60, doi:10.1016/j.foreco.2006.06.001.
47. Coolon, J.D.; Jones, K.L.; Todd, T.C.; Blair, J.M.; Herman, M.A. Long-Term Nitrogen Amendment Alters the Diversity and Assemblage of Soil Bacterial Communities in Tallgrass Prairie. *PLOS ONE* **2013**, *8*, e67884, doi:10.1371/journal.pone.0067884.
48. Cowan, A.D.; Smith, J.E.; Fitzgerald, S.A. Recovering Lost Ground: Effects of Soil Burn Intensity on Nutrients and Ectomycorrhiza Communities of Ponderosa Pine Seedlings. *Forest Ecology and Management* **2016**, *378*, 160–172, doi:10.1016/j.foreco.2016.07.030.



49. Čuchta, P.; Miklisová, D.; Kováč, Ľ. Changes within Collembolan Communities in Windthrown European Montane Spruce Forests 2 Years after Disturbance by Fire. *Annals of Forest Science* **2012**, *69*, 81–92, doi:10.1007/s13595-011-0114-y.
50. Čuchta, P.; Miklisová, D.; Kováč, Ľ. The Impact of Disturbance and Ensuing Forestry Practices on Collembola in Monitored Stands of Windthrown Forest in the Tatra National Park (Slovakia). *Environ Monit Assess* **2013**, *185*, 5085–5098, doi:10.1007/s10661-012-2927-z.
51. Dahlberg, A.; Schimmel, J.; Taylor, A.F.S.; Johannesson, H. Post-fire Legacy of Ectomycorrhizal Fungal Communities in the Swedish Boreal Forest in Relation to Fire Severity and Logging Intensity. *Biological Conservation* **2001**, *11*.
52. Dannenmann, M.; Willibald, G.; Sippel, S.; Butterbach-Bahl, K. Nitrogen Dynamics at Undisturbed and Burned Mediterranean Shrublands of Salento Peninsula, Southern Italy. *Plant Soil* **2011**, *343*, 5–15, doi:10.1007/s11104-010-0541-9.
53. D'Ascoli, R.; Rutigliano, F.A.; De Pascale, R.A.; Gentile, A.; De Santo, A.V. Functional Diversity of the Microbial Community in Mediterranean Maquis Soils as Affected by Fires. *Int. J. Wildland Fire* **2005**, *14*, 355, doi:10.1071/WF05032.
54. Davies, K.W.; Bates, J.D.; Boyd, C.S.; Nafus, A.M. Is Fire Exclusion in Mountain Big Sagebrush Communities Prudent? Soil Nutrient, Plant Diversity and Arthropod Response to Burning. *Int. J. Wildland Fire* **2014**, *23*, 417, doi:10.1071/WF13167.
55. Davis, D.M.; Crawford, J.A. Case Study: Short-Term Response of Greater Sage-Grouse Habitats to Wildfire in Mountain Big Sagebrush Communities: Sage-Grouse Habitat Response to Wildfire. *Wildl. Soc. Bull.* **2015**, *39*, 129–137, doi:10.1002/wsb.505.
56. de Azevedo, L.C.B.; Stürmer, S.L.; Lambais, M.R. Early Changes in Arbuscular Mycorrhiza Development in Sugarcane under Two Harvest Management Systems. *Braz J Microbiol* **2014**, *45*, 995–1005.
57. Dhillon, S.S.; Anderson, R.C. Growth Dynamics and Associated Mycorrhizal Fungi of Little Bluestem Grass [*Schizachyrium Scoparium* (Michx.) Nash] on Burned and Unburned Sand Prairies. *New Phytologist* **1993**, *123*, 77–91, doi:10.1111/j.1469-8137.1993.tb04533.x.
58. Dhillon, S.S.; Anderson, R.C. Root Growth, and Microorganisms Associated with the Rhizoplane and Root Zone Soil of a Native C4 Grass on Burned and Unburned Sand Prairies. *Biol Fertil Soils* **1994**, *17*, 115–120, doi:10.1007/BF00337742.
59. Smith DiCarlo, L.A.; DeBano, S.J.; Burrows, S. Short-Term Response of Two Beneficial Invertebrate Groups to Wildfire in an Arid Grassland System, United States. *Rangeland Ecology & Management* **2019**, *72*, 551–560, doi:10.1016/j.rama.2018.11.011.
60. Doamba, S.W.M.F.; Savadogo, P.; Nacro, H.B. Effects of Burning on Soil Macrofauna in a Savanna-Woodland under Different Experimental Fuel Load Treatments. *Applied Soil Ecology* **2014**, *81*, 37–44, doi:10.1016/j.apsoil.2014.04.005.

61. Docherty, K.M.; Balser, T.C.; Bohannon, B.J.M.; Gutknecht, J.L.M. Soil Microbial Responses to Fire and Interacting Global Change Factors in a California Annual Grassland. *Biogeochemistry* **2012**, *109*, 63–83, doi:10.1007/s10533-011-9654-3.
62. Dress, W.J.; Boerner, R.E.J. Patterns of Microarthropod Abundance in Oak–Hickory Forest Ecosystems in Relation to Prescribed Fire and Landscape Position. *Pedobiologia* **2004**, *48*, 1–8, doi:10.1016/j.pedobi.2003.03.001.
63. Dumontet, S.; Dinel, H.; Scopa, A.; Mazzatura, A.; Saracino, A. Post-Fire Soil Microbial Biomass and Nutrient Content of a Pine Forest Soil from a Dunal Mediterranean Environment. *Soil Biology and Biochemistry* **1996**, *28*, 1467–1475, doi:10.1016/S0038-0717(96)00160-5.
64. Elliott, M.; Lawson, S.; Hayes, A.; Debuse, V.; York, A.; Lewis, T. The Response of Cerambycid Beetles (Coleoptera: Cerambycidae) to Long-Term Fire Frequency Regimes in Subtropical Eucalypt Forest. *Austral Ecology* **2019**, *44*, 609–620, doi:10.1111/aec.12702.
65. Ferrenberg, S.M.; Schwilk, D.W.; Knapp, E.E.; Groth, E.; Keeley, J.E. Fire Decreases Arthropod Abundance but Increases Diversity: Early and Late Season Prescribed Fire Effects in a Sierra Nevada Mixed-Conifer Forest. *fire ecol* **2006**, *2*, 79–102, doi:10.4996/fireecology.0202079.
66. Ferrenberg, S.; O'Neill, S.P.; Knelman, J.E.; Todd, B.; Duggan, S.; Bradley, D.; Robinson, T.; Schmidt, S.K.; Townsend, A.R.; Williams, M.W.; et al. Changes in Assembly Processes in Soil Bacterial Communities Following a Wildfire Disturbance. *ISME J* **2013**, *7*, 1102–1111, doi:10.1038/ismej.2013.11.
67. Fischer, R.A.; Reese, K.P.; Connelly, J.W. An Investigation on Fire Effects within Xeric Sage Grouse Brood Habitat. *Journal of Range Management* **1996**, *49*, 194, doi:10.2307/4002877.
68. Fontúrbel, M.T.; Barreiro, A.; Vega, J.A.; Martín, A.; Jiménez, E.; Carballas, T.; Fernández, C.; Díaz-Raviña, M. Effects of an Experimental Fire and Post-Fire Stabilization Treatments on Soil Microbial Communities. *Geoderma* **2012**, *191*, 51–60, doi:10.1016/j.geoderma.2012.01.037.
69. Foster, C.N.; Barton, P.S.; Sato, C.F.; Wood, J.T.; MacGregor, C.I.; Lindenmayer, D.B. Herbivory and Fire Interact to Affect Forest Understory Habitat, but Not Its Use by Small Vertebrates: Fire-Herbivory Interactions Drive Vegetation but Not Fauna. *Anim Conserv* **2016**, *19*, 15–25, doi:10.1111/acv.12210.
70. Fritze, H.; Smolander, A.; Levula, T.; Kitunen, V.; Mäkelä, E. Wood-Ash Fertilization and Fire Treatments in a Scots Pine Forest Stand: Effects on the Organic Layer, Microbial Biomass, and Microbial Activity. *Biol Fert Soils* **1994**, *17*, 57–63, doi:10.1007/BF00418673.
71. Fuentes-Ramirez, A.; Barrientos, M.; Almonacid, L.; Arriagada-Escamilla, C.; Salas-Eljatib, C. Short-Term Response of Soil Microorganisms, Nutrients and Plant Recovery in Fire-Affected Araucaria Araucana Forests. *Applied Soil Ecology* **2018**, *131*, 99–106, doi:10.1016/j.apsoil.2018.08.010.
72. Fultz, L.M.; Moore-Kucera, J.; Dathe, J.; Davinic, M.; Perry, G.; Wester, D.; Schwilk, D.W.; Rideout-Hanzak, S. Forest Wildfire and Grassland Prescribed Fire Effects on Soil Biogeochemical

Processes and Microbial Communities: Two Case Studies in the Semi-Arid Southwest. *Applied Soil Ecology* **2016**, 99, 118–128, doi:10.1016/j.apsoil.2015.10.023.

73. Furukori, N.; Kishimoto-Yamada, K.; Homma, K. Impacts of Burning and Herbicide Disturbances on Soil Animals and Organic Matter Decomposition in Terraced Paddy Field Levees in Japanese Satoyama. *J Soil Sci Plant Nutr* **2022**, 22, 270–280, doi:10.1007/s42729-021-00646-2.
74. Gaines, W.L.; Lyons, A.L.; Weaver, K.; Sprague, A. Monitoring the Short-Term Effects of Prescribed Fire on an Endemic Mollusk in the Dry Forests of the Eastern Cascades, Washington, USA. *Forest Ecology and Management* **2011**, 261, 1460–1465, doi:10.1016/j.foreco.2011.01.034.
75. García-Domínguez, C.; Arévalo, J.R.; Calvo, L. Short-Term Effects of Low-Intensity Prescribed Fire on Ground-Dwelling Invertebrates in a Canarian Pine Forest. *Forest Syst* **2010**, 19, 112, doi:10.5424/fs/2010191-01172.
76. Garcia-Oliva, F.; Jr, R.L.S.; Kelly, E. Effect of Burning of Tropical Deciduous Forest Soil in Mexico on the Microbial Degradation of Organic Matter. *Plant and Soil* **1999**, 206, 29–368.
77. Gibson, D.J.; Hetrick, B.A.D. Topographic and Fire Effects on the Composition and Abundance of Va-Mycorrhizal Fungi in Tallgrass Prairie. *Mycologia* **1988**, 80, 433–441, doi:10.1080/00275514.1988.12025564.
78. Gongalsky, K.B.; Persson, T. Recovery of Soil Macrofauna after Wildfires in Boreal Forests. *Soil Biology and Biochemistry* **2013**, 57, 182–191, doi:10.1016/j.soilbio.2012.07.005.
79. Gongalsky, K.B.; Malmström, A.; Zaitsev, A.S.; Shakhhab, S.V.; Bengtsson, J.; Persson, T. Do Burned Areas Recover from inside? An Experiment with Soil Fauna in a Heterogeneous Landscape. *Applied Soil Ecology* **2012**, 59, 73–86, doi:10.1016/j.apsoil.2012.03.017.
80. Gongalsky, K.B.; Zaitsev, A.S.; Korobushkin, D.I.; Saifutdinov, R.A.; Yazrikova, T.E.; Benediktova, A.I.; Gorbunova, A.Yu.; Gorshkova, I.A.; Butenko, K.O.; Kosina, N.V.; et al. Diversity of the Soil Biota in Burned Areas of Southern Taiga Forests (Tver Oblast). *Eurasian Soil Sc.* **2016**, 49, 358–366, doi:10.1134/S1064229316030042.
81. Grabczynska, O.; Olejniczak, I.; Predecka, A.; Russel, S. Short-Term Effects of Prescribed Forest Fire on Soil Mites (Acari). *Polish Journal of Ecology* **2009**, 57, 805–809.
82. Grady, K.C.; Hart, S.C. Influences of Thinning, Prescribed Burning, and Wildfire on Soil Processes and Properties in Southwestern Ponderosa Pine Forests: A Retrospective Study. *Forest Ecology and Management* **2006**, 234, 123–135, doi:10.1016/j.foreco.2006.06.031.
83. Greenberg, C.H.; Waldrop, T.A. Short-Term Response of Reptiles and Amphibians to Prescribed Fire and Mechanical Fuel Reduction in a Southern Appalachian Upland Hardwood Forest. *Forest Ecology and Management* **2008**, 255, 2883–2893, doi:10.1016/j.foreco.2008.01.064.
84. Greenberg, C.H.; Otis, D.L.; Waldrop, T.A. Response of White-Footed Mice (*Peromyscus leucopus*) to Fire and Fire Surrogate Fuel Reduction Treatments in a Southern Appalachian Hardwood Forest. *Forest Ecology and Management* **2006**, 234, 355–362, doi:10.1016/j.foreco.2006.07.022.

85. Greenberg, C.H.; Miller, S.; Waldrop, T.A. Short-Term Response of Shrews to Prescribed Fire and Mechanical Fuel Reduction in a Southern Appalachian Upland Hardwood Forest. *Forest Ecology and Management* **2007**, *243*, 231–236, doi:10.1016/j.foreco.2007.03.003.
86. Greenberg, C.H.; Forrest, T.G.; Waldrop, T. Short-Term Response of Ground-Dwelling Arthropods to Prescribed Fire and Mechanical Fuel Reduction in a Southern Appalachian Upland Hardwood Forest. *Forest Science* **2010**, *56*, 112–121.
87. Gundale, M.J.; DeLuca, T.H.; Fiedler, C.E.; Ramsey, P.W.; Harrington, M.G.; Gannon, J.E. Restoration Treatments in a Montana Ponderosa Pine Forest: Effects on Soil Physical, Chemical and Biological Properties. *Forest Ecology and Management* **2005**, *213*, 25–38, doi:10.1016/j.foreco.2005.03.015.
88. Guo, J.; Chen, G.; Xie, J.; Yang, Z.; Yang, Y. Effect of Heat-Disturbance on Microbial Biomass Carbon and Microbial Respiration in Chinese Fir (*Cunninghamia Lanceolata*) Forest Soils. *J. For. Res.* **2015**, *26*, 933–939, doi:10.1007/s11676-015-0125-x.
89. Haimi, J.; Fritze, H.; Moilanen, P. Responses of Soil Decomposer Animals to Wood-Ash Fertilisation and Burning in a Coniferous Forest Stand. *Forest Ecology and Management* **2000**, *129*, 53–61, doi:10.1016/S0378-1127(99)00158-9.
90. Hale, S.L.; Riffell, S.; Burger, L.W.; Adams, H.L.; Dollar, J.G. Fire Ant Response to Management of Native Grass Conservation Buffers. *The American Midland Naturalist* **2011**, *166*, 283–291, doi:10.1674/0003-0031-166.2.283.
91. Halvorson, J.J.; Bolton, H., Jr.; Smith, J.L. The Pattern of Soil Variables Related to *Artemisia Tridentata* in a Burned Shrub-Steppe Site. *Soil Science Society of America Journal* **1997**, *61*, 287–294, doi:10.2136/sssaj1997.03615995006100010041x.
92. Hamman, S.T.; Burke, I.C.; Stromberger, M.E. Relationships between Microbial Community Structure and Soil Environmental Conditions in a Recently Burned System. *Soil Biology and Biochemistry* **2007**, *39*, 1703–1711, doi:10.1016/j.soilbio.2007.01.018.
93. Hanan, E.J.; D’Antonio, C.M.; Roberts, D.A.; Schimel, J.P. Factors Regulating Nitrogen Retention During the Early Stages of Recovery from Fire in Coastal Chaparral Ecosystems. *Ecosystems* **2016**, *19*, 910–926, doi:10.1007/s10021-016-9975-0.
94. Hanula, J.L.; Wade, D.D. Influence of Long-Term Dormant-Season Burning and Fire Exclusion on Ground-Dwelling Arthropod Populations in Longleaf Pine Flatwoods Ecosystems. *Forest Ecology and Management* **2003**, *175*, 163–184, doi:10.1016/S0378-1127(02)00130-5.
95. Harper, M.G.; Dietrich, C.H.; Larimore, R.L.; Tessene, P.A. Effects of Prescribed Fire on Prairie Arthropods: An Enclosure Study. *Natural Areas Journal* **2000**, *20*, 325–335.
96. Harris, W.N.; Boutton, T.W.; Ansley, R.J. Plant Community and Soil Microbial Carbon and Nitrogen Responses to Fire and Clipping in a Southern Mixed Grassland. *Rangeland Ecology & Management* **2008**, *61*, 580–587, doi:10.2111/07-047.1.

97. Henig-Sever, N.; Poliakov, D.; Broza, M. A Novel Method for Estimation of Wild Fire Intensity Based on Ash PH and Soil Microarthropod Community. *Pedobiologia* **2001**, *45*, 98–106, doi:10.1078/0031-4056-00072.
98. Herrando, S.; Brotons, L.; Llacuna, S. Post-Fire Dynamics in Mediterranean Shrublands: Are Bird Communities Structured by Arthropod Availability? *Revista Catalana d'Ornitologia* **2005**, *21*, 17–28.
99. Heydari, M.; Faramarzi, M.; Pothier, D. Post-Fire Recovery of Herbaceous Species Composition and Diversity, and Soil Quality Indicators One Year after Wildfire in a Semi-Arid Oak Woodland. *Ecological Engineering* **2016**, *94*, 688–697, doi:10.1016/j.ecoleng.2016.05.032.
100. Huebner, K.; Lindo, Z.; Lechowicz, M.J. Post-Fire Succession of Collembolan Communities in a Northern Hardwood Forest. *European Journal of Soil Biology* **2012**, *48*, 59–65, doi:10.1016/j.ejsobi.2011.10.004.
101. Hugo-Coetzee, E.A.; Avenant, N.L. The Effect of Fire on Soil Oribatid Mites (Acari: Oribatida) in a South African Grassland\*. *Zoosymposia* **2011**, *6*, 210–220, doi:10.11646/zoosymposia.6.1.31.
102. Hulton VanTassel, H.L.; Barrows, C.W.; Anderson, K.E. Post-Fire Spatial Heterogeneity Alters Ground-Dwelling Arthropod and Small Mammal Community Patterns in a Desert Landscape Experiencing a Novel Disturbance Regime. *Biological Conservation* **2015**, *182*, 117–125, doi:10.1016/j.biocon.2014.11.046.
103. Hylander, K. The Response of Land Snail Assemblages below Aspens to Forest Fire and Clear-Cutting in Fennoscandian Boreal Forests. *Forest Ecology and Management* **2011**, *261*, 1811–1819, doi:10.1016/j.foreco.2011.02.003.
104. Infante, J.; Novoa, F.J.; Ibarra, J.T.; Melnick, D.J.; Griffin, K.L.; Bonacic, C. Altered Fire Regimes Modify Lizard Communities in Globally Endangered Araucaria Forests of the Southern Andes. *Sci Rep* **2021**, *11*, 22709, doi:10.1038/s41598-021-02169-3.
105. Jangid, K.; Williams, M.A.; Franzluebbers, A.J.; Blair, J.M.; Coleman, D.C.; Whitman, W.B. Development of Soil Microbial Communities during Tallgrass Prairie Restoration. *Soil Biology and Biochemistry* **2010**, *42*, 302–312, doi:10.1016/j.soilbio.2009.11.008.
106. Jensen, M.; Michelsen, A.; Gashaw, M. Responses in Plant, Soil Inorganic and Microbial Nutrient Pools to Experimental Fire, Ash and Biomass Addition in a Woodland Savanna. *Oecologia* **2001**, *128*, 85–93, doi:10.1007/s004420000627.
107. Jiang, R.; Sun, L.; Hu, H. The Seasonal Dynamics of Soil Microbial Biomass of a *Larix Gmelinii* Forest after Wildfire. *Afr. J. Microbiol. Res.* **2012**, *6*, doi:10.5897/AJMR11.1264.
108. Jiménez Esquilín, A.E.; Stromberger, M.E.; Massman, W.J.; Frank, J.M.; Shepperd, W.D. Microbial Community Structure and Activity in a Colorado Rocky Mountain Forest Soil Scarred by Slash Pile Burning. *Soil Biology and Biochemistry* **2007**, *39*, 1111–1120, doi:10.1016/j.soilbio.2006.12.020.

109. Jiménez Esquilín, A.E.; Stromberger, M.E.; Shepperd, W.D. Soil Scarification and Wildfire Interactions and Effects on Microbial Communities and Carbon. *Soil Sci. Soc. Am. j.* **2008**, *72*, 111–118, doi:10.2136/sssaj2006.0292.
110. Johnson, C.N. Interactions between Fire, Mycophagous Mammals, and Dispersal of Ectomycorrhizal Fungi in Eucalyptus Forests. *Oecologia* **1995**, *104*, 467–475, doi:10.1007/BF00341344.
111. Jones, M.D.; Twieg, B.D.; Ward, V.; Barker, J.; Durall, D.M.; Simard, S.W. Functional Complementarity of Douglas-Fir Ectomycorrhizas for Extracellular Enzyme Activity after Wildfire or Clearcut Logging. *Functional Ecology* **2010**, *24*, 1139–1151, doi:10.1111/j.1365-2435.2010.01699.x.
112. Jonsson, L.; Dahlberg, A.; Nilsson, M.-C.; Zackrisson, O.; Kårén, O. Ectomycorrhizal Fungal Communities in Late-Successional Swedish Boreal Forests, and Their Composition Following Wildfire. *Molecular Ecology* **1999**, *8*, 205–215, doi:10.1046/j.1365-294x.1999.00553.x.
113. Kara, O.; Bolat, I. Short-Term Effects of Wildfire on Microbial Biomass and Abundance in Black Pine Plantation Soils in Turkey. *Ecological Indicators* **2009**, *9*, 1151–1155, doi:10.1016/j.ecolind.2009.01.002.
114. Kaynaş, B.Y. The Effects of Fire on Surface-Dwelling Arthropod Communities in Pinus Brutia Forests of Southwestern Anatolia. *jist* **2016**, *6*, 33–33, doi:10.21597/jist.2016218845.
115. Kennedy, N.; Egger, K.N. Impact of Wildfire Intensity and Logging on Fungal and Nitrogen-Cycling Bacterial Communities in British Columbia Forest Soils. *Forest Ecology and Management* **2010**, *260*, 787–794, doi:10.1016/j.foreco.2010.05.037.
116. Khodadad, C.L.M.; Zimmerman, A.R.; Green, S.J.; Uthandi, S.; Foster, J.S. Taxa-Specific Changes in Soil Microbial Community Composition Induced by Pyrogenic Carbon Amendments. *Soil Biology and Biochemistry* **2011**, *43*, 385–392, doi:10.1016/j.soilbio.2010.11.005.
117. Kim, J.W.; Jung, C. Abundance of Soil Microarthropods Associated with Forest Fire Severity in Samcheok, Korea. *Journal of Asia-Pacific Entomology* **2008**, *11*, 77–81, doi:10.1016/j.aspen.2008.05.003.
118. Köster, K.; Berninger, F.; Heinonsalo, J.; Lindén, A.; Köster, E.; Ilvesniemi, H.; Pumpanen, J. The Long-Term Impact of Low-Intensity Surface Fires on Litter Decomposition and Enzyme Activities in Boreal Coniferous Forests. *Int. J. Wildland Fire* **2016**, *25*, 213, doi:10.1071/WF14217.
119. Lazarina, M.; Sgardelis, S.P.; Tscheulin, T.; Kallimanis, A.S.; Devalez, J.; Petanidou, T. Bee Response to Fire Regimes in Mediterranean Pine Forests: The Role of Nesting Preference, Trophic Specialization, and Body Size. *Basic and Applied Ecology* **2016**, *17*, 308–320, doi:10.1016/j.baae.2016.02.001.
120. Lisa, C.; Paffetti, D.; Nocentini, S.; Marchi, E.; Bottalico, F.; Fiorentini, S.; Travaglini, D. Impact of Wildfire on the Edaphic Microarthropod Community in a Pinus Pinaster Forest in Central Italy. *iForest* **2015**, *8*, 874–883, doi:10.3832/ifor1404-008.

121. Liu, X.; Chen, C.; Wang, W.; Hughes, J.M.; Lewis, T.; Hou, E.; Shen, J. Vertical Distribution of Soil Denitrifying Communities in a Wet Sclerophyll Forest under Long-Term Repeated Burning. *Microb Ecol* **2015**, *70*, 993–1003, doi:10.1007/s00248-015-0639-y.
122. Liu, W.; Xu, W.; Han, Y.; Wang, C.; Wan, S. Responses of Microbial Biomass and Respiration of Soil to Topography, Burning, and Nitrogen Fertilization in a Temperate Steppe. *Biol Fertil Soils* **2007**, *44*, 259–268, doi:10.1007/s00374-007-0198-6.
123. Liu, W.; Xu, W.; Hong, J.; Wan, S. Interannual Variability of Soil Microbial Biomass and Respiration in Responses to Topography, Annual Burning and N Addition in a Semiarid Temperate Steppe. *Geoderma* **2010**, *158*, 259–267, doi:10.1016/j.geoderma.2010.05.004.
124. Loeb, S.C.; Waldrop, T.A. Bat Activity in Relation to Fire and Fire Surrogate Treatments in Southern Pine Stands. *Forest Ecology and Management* **2008**, *255*, 3185–3192, doi:10.1016/j.foreco.2007.10.060.
125. Lombao, A.; Barreiro, A.; Carballas, T.; Fontúrbel, M.T.; Martín, A.; Vega, J.A.; Fernández, C.; Díaz-Raviña, M. Changes in Soil Properties after a Wildfire in Fragas Do Eume Natural Park (Galicia, NW Spain). *CATENA* **2015**, *135*, 409–418, doi:10.1016/j.catena.2014.08.007.
126. Longo, S.; Nouhra, E.; Goto, B.T.; Berbara, R.L.; Urcelay, C. Effects of Fire on Arbuscular Mycorrhizal Fungi in the Mountain Chaco Forest. *Forest Ecology and Management* **2014**, *315*, 86–94, doi:10.1016/j.foreco.2013.12.027.
127. Mabuhay, J.A.; Nakagoshi, N.; Isagi, Y. Soil Microbial Biomass, Abundance, and Diversity in a Japanese Red Pine Forest: First Year after Fire. *Journal of Forest Research* **2006**, *11*, 165–173, doi:10.1007/s10310-005-0201-8.
128. Mah, K.; Tackaberry, L.E.; Egger, K.N.; Massicotte, H.B. The Impacts of Broadcast Burning after Clear-Cutting on the Diversity of Ectomycorrhizal Fungi Associated with Hybrid Spruce Seedlings in Central British Columbia. **2001**, *31*, 12.
129. Malmström, A.; Persson, T.; Ahlström, K. Effects of Fire Intensity on Survival and Recovery of Soil Microarthropods after a Clearcut Burning. *Can. J. For. Res.* **2008**, *38*, 2465–2475, doi:10.1139/X08-094.
130. Li, W.; Liu, X.; Niu, S. Differential Responses of the Acidobacterial Community in the Topsoil and Subsoil to Fire Disturbance in *Pinus Tabulaeformis* Stands. *PeerJ* **2019**, *7*, e8047, doi:10.7717/peerj.8047.
131. Malmström, A.; Persson, T.; Ahlström, K.; Gongalsky, K.B.; Bengtsson, J. Dynamics of Soil Meso- and Macrofauna during a 5-Year Period after Clear-Cut Burning in a Boreal Forest. *Applied Soil Ecology* **2009**, *43*, 61–74, doi:10.1016/j.apsoil.2009.06.002.
132. Marozas, V.; Armolaitis, K.; Aleinikovienė, J. Changes of Ground Vegetation, Soil Chemical Properties and Microbiota Following the Surface Fires in Scots Pine Forests. *Journal of Environmental Engineering and Landscape Management* **2013**, *21*, 67–75, doi:10.3846/16486897.2012.663087.

133. Martín-Pinto, P.; Vaquerizo, H.; Peñalver, F.; Olaizola, J.; Oria-de-Rueda, J.A. Early Effects of a Wildfire on the Diversity and Production of Fungal Communities in Mediterranean Vegetation Types Dominated by *Cistus Ladanifer* and *Pinus Pinaster* in Spain. *Forest Ecology and Management* **2006**, *225*, 296–305, doi:10.1016/j.foreco.2006.01.006.
134. Masaphy, S.; Zabari, L. Observations on Post-Fire Black Morel Ascocarp Development in an Israeli Burnt Forest Site and Their Preferred Micro-Sites. *Fungal Ecology* **2013**, *6*, 316–318, doi:10.1016/j.funeco.2013.02.005.
135. Mateos, E.; Santos, X.; Pujade-Villar, J. Taxonomic and Functional Responses to Fire and Post-Fire Management of a Mediterranean Hymenoptera Community. *Environmental Management* **2011**, *48*, 1000–1012, doi:10.1007/s00267-011-9750-0.
136. Matthews, C.E.; Moorman, C.E.; Greenberg, C.H.; Waldrop, T.A. Response of Soricid Populations to Repeated Fire and Fuel Reduction Treatments in the Southern Appalachian Mountains. *Forest Ecology and Management* **2009**, *257*, 1939–1944, doi:10.1016/j.foreco.2009.02.006.
137. McGee, S.; Tidwell, A.; Riggs, E.; Veltkamp, H.; Zahn, G. *Long-Term Soil Fungal Community Recovery after Fire Is Impacted by Climate Change*; Ecology, 2020;
138. Meehan, T.D.; George, T.L. Short-Term Effects of Moderate- to High-Severity Wildfire on a Disturbance-Dependent Flycatcher in Northwest California. *The Auk* **2003**, *120*, 1102–1113, doi:10.1093/auk/120.4.1102.
139. Moreira, M.; Baretta, D.; Tsai, S.M.; Cardoso, E.J.B.N. Spore Density and Root Colonization by Arbuscular Mycorrhizal Fungi in Preserved or Disturbed *Araucaria Angustifolia* (Bert.) O. Ktze. Ecosystems. *Sci. agric. (Piracicaba, Braz.)* **2006**, *63*, 380–385, doi:10.1590/S0103-90162006000400009.
140. Moretti, M.; Obrist, M.K.; Duelli, P. Arthropod Biodiversity after Forest Fires: Winners and Losers in the Winter Fire Regime of the Southern Alps. *Ecography* **2004**, *27*, 173–186, doi:10.1111/j.0906-7590.2004.03660.x.
141. Moretti, M.; Duelli, P.; Obrist, M.K. Biodiversity and Resilience of Arthropod Communities after Fire Disturbance in Temperate Forests. *Oecologia* **2006**, *149*, 312–327, doi:10.1007/s00442-006-0450-z.
142. Motiejūnaitė, J.; Adamonytė, G.; Iršėnaitė, R.; Juzėnas, S.; Kasparavičius, J.; Kutorga, E.; Markovskaja, S. Early Fungal Community Succession Following Crown Fire in *Pinus Mugo* Stands and Surface Fire in *Pinus Sylvestris* Stands. *Eur J Forest Res* **2014**, *133*, 745–756, doi:10.1007/s10342-013-0738-6.
143. Nasim, G. CROP STRAW BURNING PRACTICE-A THREAT TO ARBUSCULAR MYCORRHIZAL BIODIVERSITY. *Pakistan Journal of Botany* **2011**, *43*, 2961–2966.
144. Nicholson, E.; Lill, A.; Andersen, A. Do Tropical Savanna Skink Assemblages Show a Short-Term Response to Low-Intensity Fire? *Wildl. Res.* **2006**, *33*, 331, doi:10.1071/WR05067.



145. Niwa, C.G.; Peck, R.W. Influence of Prescribed Fire on Carabid Beetle (Carabidae) and Spider (Araneae) Assemblages in Forest Litter in Southwestern Oregon. *Environ Entomol* **2002**, *31*, 785–796, doi:10.1603/0046-225X-31.5.785.
146. Nkwabi, A.K.; Sinclair, A.R.E.; Metzger, K.L.; Mduma, S.A.R. Disturbance, Species Loss and Compensation: Wildfire and Grazing Effects on the Avian Community and Its Food Supply in the Serengeti Ecosystem, Tanzania: DISTURBANCE ON AVIAN AND ARTHROPOD COMMUNITY. *Austral Ecology* **2011**, *36*, 403–412, doi:10.1111/j.1442-9993.2010.02167.x.
147. Ok-Sun, K.; Jae-Jun, Y.; Dong-Hun, L.; Tae-Seok, A.; Hong-Gyu, S. Monitoring of Bacterial Community in a Coniferous Forest Soil After a Wildfire. *Journal of Microbiology* **2004**, *42*, 278–284.
148. Oliver, A.K.; Callaham, M.A.; Jumpponen, A. Soil Fungal Communities Respond Compositionally to Recurring Frequent Prescribed Burning in a Managed Southeastern US Forest Ecosystem. *Forest Ecology and Management* **2015**, *345*, 1–9, doi:10.1016/j.foreco.2015.02.020.
149. Overby, S.T.; Hart, S.C. Short-Term Belowground Responses to Thinning and Burning Treatments in Southwestern Ponderosa Pine Forests of the USA. *Forests* **2016**, *7*, 45, doi:10.3390/f7020045.
150. Pairis, M.; Sundermann, J.; Wang, H. Fire, Mowing and Soil Moisture Levels Have No Significant Effects on Underground Arthropod Population and Diversity. *Tillers* **2003**, *4*, 33–37.
151. Palese, A.M.; Giovannini, G.; Lucchesi, S.; Dumontet, S.; Perucci, P. Effect of Fire on Soil C, N and Microbial Biomass. *Agronomie* **2004**, *24*, 47–53, doi:10.1051/agro:2003061.
152. Parmenter, R.R.; Kreutzian, M.; Moore, D.I.; Lightfoot, D.C. Short-Term Effects of a Summer Wildfire on a Desert Grassland Arthropod Community in New Mexico. *Environ Entomol* **2011**, *40*, 1051–1066, doi:10.1603/EN11047.
153. Parr, C.L.; Robertson, H.G.; Biggs, H.C.; Chown, S.L. Response of African Savanna Ants to Long-Term Fire Regimes: Savanna Ants and Fire. *Journal of Applied Ecology* **2004**, *41*, 630–642, doi:10.1111/j.0021-8901.2004.00920.x.
154. Pastro, L.A.; Dickman, C.R.; Letnic, M. Effects of Wildfire, Rainfall and Region on Desert Lizard Assemblages: The Importance of Multi-Scale Processes. *Oecologia* **2013**, *173*, 603–614, doi:10.1007/s00442-013-2642-7.
155. Pen-Mouratov, S.; Ginzburg, O.; Whitford, W.G.; Steinberger, Y. Forest Fire Modifies Soil Free-Living Nematode Communities in the Biriya Woodland of Northern Israel. *Zoological Studies* **2012**, *9*.
156. Polchaninova, N.; Savchenko, G.; Ronkin, V.; Drovalenko, A.; Putschkov, A. Summer Fire in Steppe Habitats: Long-Term Effects on Vegetation and Autumnal Assemblages of Cursorial Arthropods. *Hacquetia* **2019**, *18*, 213–231, doi:10.2478/hacq-2019-0006.
157. Pourreza, M.; Hosseini, S.M.; Safari Sinegani, A.A.; Matinzadeh, M.; Dick, W.A. Soil Microbial Activity in Response to Fire Severity in Zagros Oak (*Quercus Brantii* Lindl.) Forests, Iran, after One Year. *Geoderma* **2014**, *213*, 95–102, doi:10.1016/j.geoderma.2013.07.024.

158. Prieto-Fernández, A.; Acea, M.J.; Carballas, T. Soil Microbial and Extractable C and N after Wildfire. *Biology and Fertility of Soils* **1998**, *27*, 132–142, doi:10.1007/s003740050411.
159. Puga, J.R.L.; Abrantes, N.J.C.; Oliveira, M.J.S.; Vieira, D.C.S.; Faria, S.R.; Gonçalves, F.; Keizer, J.J. Long-Term Impacts of Post-Fire Mulching on Ground-Dwelling Arthropod Communities in a Eucalypt Plantation. *Land Degrad. Develop.* **2017**, *28*, 1156–1162, doi:10.1002/ldr.2583.
160. Radho-Toly, S.; Majer, J.D.; Yates, C. Impact of Fire on Leaf Nutrients, Arthropod Fauna and Herbivory of Native and Exotic Eucalypts in Kings Park, Perth, Western Australia: IMPACT OF FIRE ON EUCALYPTS IN KINGS PARK. *Austral Ecology* **2001**, *26*, 500–506, doi:10.1046/j.1442-9993.2001.01133.x.
161. Rahkonen, J.; Pietikäinen, J.; Jokela, H. The Effects of Flame Weeding on Soil Microbial Biomass. *Biological Agriculture & Horticulture* **1999**, *16*, 363–368, doi:10.1080/01448765.1999.9755239.
162. Rashid, A.; Ahmed, T.; Ayub, N.; Khan, A.G. Effect of Forest Fire on Number, Viability and Post-Fire Re-Establishment of Arbuscular Mycorrhizae. *Mycorrhiza* **1997**, *7*, 217–220, doi:10.1007/s005720050183.
163. Rau, B.M.; Blank, R.R.; Morgan, T. Proceedings-Shrublands under Fire: Disturbance and Recovery in a Changing World; 2006 June 6-8; Cedar City, UT. *USDA Forest Service Proceedings* **2008**, *52*, 175–178.
164. Renčo, M.; Čerevková, A. Long-Term Effects of a Wildfire on the Soil Nematode Communities in the Spruce Forest Ecosystem of High Tatra National Park. *Int. J. Wildland Fire* **2015**, *24*, 702, doi:10.1071/WF14138.
165. Rhodes, E.C.; Bates, J.D.; Sharp, R.N.; Davies, K.W. Fire Effects on Cover and Dietary Resources of Sage-Grouse Habitat. *Journal of Wildlife Management* **2010**, *74*, 755–764, doi:10.2193/2009-143.
166. Ross, P.M.; Harvey, K.; Vecchio, E.M.; Beckers, D. Impact of Fire and the Recovery of Molluscs in South-East Australian Salt Marsh. *Ecological Management & Restoration* **2019**, *20*, 126–135, doi:10.1111/emr.12374.
167. Rossi, J.P.; Celini, L.; Mora, P.; Mathieu, J.; Lapied, E.; Nahmani, J.; Ponge, J.-F.; Lavelle, P. Decreasing Fallow Duration in Tropical Slash-and-Burn Agriculture Alters Soil Macroinvertebrate Diversity: A Case Study in Southern French Guiana. *Agriculture, Ecosystems & Environment* **2010**, *135*, 148–154, doi:10.1016/j.agee.2009.08.012.
168. Ruchin, A.B.; Alekseev, S.K.; Ecological club «Stenus»; Khapugin, A.A.; Joint Directorate of the Mordovia State Nature Reserve and National Park “Smolny”; Tyumen State University Post-Fire Fauna of Carabid Beetles (Coleoptera, Carabidae) in Forests of the Mordovia State Nature Reserve (Russia). *Nat. Conserv. Res.* **2019**, *4*, doi:10.24189/ncr.2019.009.
169. Rutigliano, F.A.; De Marco, A.; D’Ascoli, R.; Castaldi, S.; Gentile, A.; Virzo De Santo, A. Impact of Fire on Fungal Abundance and Microbial Efficiency in C Assimilation and Mineralisation in a Mediterranean Maquis Soil. *Biol Fertil Soils* **2007**, *44*, 377–381, doi:10.1007/s00374-007-0214-x.

170. Rutigliano, F.A.; Migliorini, M.; Maggi, O.; D'Ascoli, R.; Fanciulli, P.P.; Persiani, A.M. Dynamics of Fungi and Fungivorous Microarthropods in a Mediterranean Maquis Soil Affected by Experimental Fire. *European Journal of Soil Biology* **2013**, *56*, 33–43, doi:10.1016/j.ejsobi.2013.02.006.
171. Sackmann, P.; Farji-Brener, A. Effect of Fire on Ground Beetles and Ant Assemblages along an Environmental Gradient in NW Patagonia: Does Habitat Type Matter? *Écoscience* **2006**, *13*, 360–371, doi:10.2980/i1195-6860-13-3-360.1.
172. Saint-Germain, M.; Larrivée, M.; Drapeau, P.; Fahrig, L.; Buddle, C.M. Short-Term Response of Ground Beetles (Coleoptera: Carabidae) to Fire and Logging in a Spruce-Dominated Boreal Landscape. *Forest Ecology and Management* **2005**, *212*, 118–126, doi:10.1016/j.foreco.2005.03.001.
173. Samu, F.; Kádár, F.; Ónodi, G.; Kertész, M.; Szirányi, A.; Szita, É.; Fetykó, K.; Neidert, D.; Botos, E.; Altbäcker, V. Differential Ecological Responses of Two Generalist Arthropod Groups, Spiders and Carabid Beetles (Araneae, Carabidae), to the Effects of Wildfire. *Community Ecology* **2010**, *11*, 129–139, doi:10.1556/ComEc.11.2010.2.1.
174. San Emeterio, L.; Múgica, L.; Ugarte, M.D.; Goicoa, T.; Canals, R.M. Sustainability of Traditional Pastoral Fires in Highlands under Global Change: Effects on Soil Function and Nutrient Cycling. *Agriculture, Ecosystems & Environment* **2016**, *235*, 155–163, doi:10.1016/j.agee.2016.10.009.
175. Seastedt, T.R.; Reddy, M.V. Fire, Mowing and Insecticide Effects on Soil Sternorrhyncha (Homoptera) Densities in Tallgrass Prairie. *Journal of the Kansas Entomological Society* **1991**, *64*, 238–242.
176. Sgardelis, S.P.; Pantis, J.D.; Argyropoulou, M.D.; Stamou, G.P. Effects of Fire on Soil Macroinvertebrates in a Mediterranean Phryganic Ecosystem. *Int. J. Wildland Fire* **1995**, *5*, 113–121, doi:10.1071/wf9950113.
177. Shen, J.; Chen, C.R.; Lewis, T. Long Term Repeated Fire Disturbance Alters Soil Bacterial Diversity but Not the Abundance in an Australian Wet Sclerophyll Forest. *Sci Rep* **2016**, *6*, 19639, doi:10.1038/srep19639.
178. Singh, D.; Sharma, P.; Kumar, U.; Daverey, A.; Arunachalam, K. Effect of Forest Fire on Soil Microbial Biomass and Enzymatic Activity in Oak and Pine Forests of Uttarakhand Himalaya, India. *Ecological Processes* **2021**, *10*, 29, doi:10.1186/s13717-021-00293-6.
179. Smith, N.R.; Kishchuk, B.E.; Mohn, W.W. Effects of Wildfire and Harvest Disturbances on Forest Soil Bacterial Communities. *Applied and Environmental Microbiology* **2008**, *74*, 216–224, doi:10.1128/AEM.01355-07.
180. Song, H.-G.; Kim, O.-S.; Yoo, J.-J.; Jeon, S.-O.; Hong, S.-H.; Lee, D.-H.; Ahn, T.-S. Monitoring of Soil Bacterial Community and Some Inoculated Bacteria After Prescribed Fire in Microcosm. *J. Microbiol.* **2004**, *42*, 285–291.

181. Sperry, J.H.; George, T.L.; Zack, S. Ecological Factors Affecting Response of Dark-Eyed Juncos to Prescribed Burning. *The Wilson Journal of Ornithology* **2008**, *120*, 131–138, doi:10.1676/06-162.1.
182. Springett, J.A. The Effects of a Single Hot Summer Fire on Soil Fauna and on Litter Decomposition in Jarrah (*Eucalyptus Marginata*) Forest in Western Australia. *Austral Ecol* **1979**, *4*, 279–291, doi:10.1111/j.1442-9993.1979.tb01219.x.
183. Stendell, E.R.; Horton, T.R.; Bruns, T.D. Early Effects of Prescribed Fire on the Structure of the Ectomycorrhizal Fungus Community in a Sierra Nevada Ponderosa Pine Forest. *Mycological Research* **1999**, *103*, 1353–1359, doi:10.1017/S0953756299008618.
184. Stuart-Smith, K.; Adams, I.T.; Larsen, K.W. Songbird Communities in a Pyrogenic Habitat Mosaic. *Int. J. Wildland Fire* **2002**, *11*, 75, doi:10.1071/WF01050.
185. Sul, W.J.; Asuming-Brempong, S.; Wang, Q.; Tourlousse, D.M.; Penton, C.R.; Deng, Y.; Rodrigues, J.L.M.; Adiku, S.G.K.; Jones, J.W.; Zhou, J.; et al. Tropical Agricultural Land Management Influences on Soil Microbial Communities through Its Effect on Soil Organic Carbon. *Soil Biology and Biochemistry* **2013**, *65*, 33–38, doi:10.1016/j.soilbio.2013.05.007.
186. Sun, H.; Santalahti, M.; Pumpanen, J.; Köster, K.; Berninger, F.; Raffaello, T.; Asiegbu, F.O.; Heinonsalo, J. Bacterial Community Structure and Function Shift across a Northern Boreal Forest Fire Chronosequence. *Sci Rep* **2016**, *6*, 32411, doi:10.1038/srep32411.
187. Tateishi, T.; Horikoshi, T.; Tsubota, H.; Takahashi, F. Application of the Chloroform Fumigation-Incubation Method to the Estimation of Soil Microbial Biomass in Burned and Unburned Japanese Red Pine Forests. *FEMS Microbiology Ecology* **1989**, *62*, 163–172.
188. Thompson, H.M.; Lesser, M.R.; Myers, L.; Mihuc, T.B. Insect Community Response Following Wildfire in an Eastern North American Pine Barrens. *Forests* **2022**, *13*, 66, doi:10.3390/f13010066.
189. Tuininga, A.R.; Dighton, J. Changes in Ectomycorrhizal Communities and Nutrient Availability Following Prescribed Burns in Two Upland Pine–Oak Forests in the New Jersey Pine Barrens. **2004**, *34*, 11.
190. Underwood, E.C.; Quinn, J.F. Response of Ants and Spiders to Prescribed Fire in Oak Woodlands of California. *J Insect Conserv* **2010**, *14*, 359–366, doi:10.1007/s10841-010-9265-7.
191. Uys, C.; Hamer, M.; Slotow, R. Step Process for Selecting and Testing Surrogates and Indicators of Afrotemperate Forest Invertebrate Diversity. *PLOS ONE* **2010**, *5*, e9100, doi:10.1371/journal.pone.0009100.
192. Valentine, L.E.; Schwarzkopf, L.; Johnson, C.N.; Grice, A.C. Burning Season Influences the Response of Bird Assemblages to Fire in Tropical Savannas. *Biological Conservation* **2007**, *137*, 90–101, doi:10.1016/j.biocon.2007.01.018.
193. Valkó, O.; Deák, B.; Magura, T.; Török, P.; Kelemen, A.; Tóth, K.; Horváth, R.; Nagy, D.D.; Debnár, Z.; Zsigrai, G.; et al. Supporting Biodiversity by Prescribed Burning in Grasslands — A Multi-Taxa

- Approach. *Science of The Total Environment* **2016**, 572, 1377–1384, doi:10.1016/j.scitotenv.2016.01.184.
194. Vasconcelos, H.L.; Pacheco, R.; Silva, R.C.; Vasconcelos, P.B.; Lopes, C.T.; Costa, A.N.; Bruna, E.M. Dynamics of the Leaf-Litter Arthropod Fauna Following Fire in a Neotropical Woodland Savanna. *PLoS ONE* **2009**, 4, e7762, doi:10.1371/journal.pone.0007762.
  195. Verble, R.M.; Yanoviak, S.P. Short-Term Effects of Prescribed Burning on Ant (Hymenoptera: Formicidae) Assemblages in Ozark Forests. *Annals of the Entomological Society of America* **2013**, 106, 198–203, doi:10.1603/AN12108.
  196. Verble-Pearson, R.M.; Yanoviak, S.P. Effects of Fire Intensity on Litter Arthropod Communities in Ozark Oak Forests, Arkansas, U.S.A. *The American Midland Naturalist* **2014**, 172, 14–24, doi:10.1674/0003-0031-172.1.14.
  197. Violi, H.A.; Barrientos-Priego, A.F.; Wright, S.F.; Escamilla-Prado, E.; Morton, J.B.; Menge, J.A.; Lovatt, C.J. Disturbance Changes Arbuscular Mycorrhizal Fungal Phenology and Soil Glomalin Concentrations but Not Fungal Spore Composition in Montane Rainforests in Veracruz and Chiapas, Mexico. *Forest Ecology and Management* **2008**, 254, 276–290, doi:10.1016/j.foreco.2007.08.016.
  198. Waldrop, M.P.; Harden, J.W. Interactive Effects of Wildfire and Permafrost on Microbial Communities and Soil Processes in an Alaskan Black Spruce Forest. *Global Change Biology* **2008**, 14, 2591–2602, doi:10.1111/j.1365-2486.2008.01661.x.
  199. Wang, C.; Wang, G.; Wang, Y.; Rafique, R.; Ma, L.; Hu, L.; Luo, Y. Fire Alters Vegetation and Soil Microbial Community in Alpine Meadow. *Land Degradation & Development* **2016**, 27, 1379–1390, doi:10.1002/ldr.2367.
  200. Whitford, W.G.; Steinberger, Y. Effects of Seasonal Grazing, Drought, Fire, and Carbon Enrichment on Soil Microarthropods in a Desert Grassland. *Journal of Arid Environments* **2012**, 83, 10–14, doi:10.1016/j.jaridenv.2012.03.021.
  201. Whitford, W.G.; Pen-Mouratov, S.; Steinberger, Y. The Effects of Prescribed Fire on Soil Nematodes in an Arid Juniper Savanna. *OJE* **2014**, 04, 66–75, doi:10.4236/oje.2014.42009.
  202. Wikars, L.-O.; Schimmel, J. Immediate Effects of Fire-Severity on Soil Invertebrates in Cut and Uncut Pine Forests. *Forest Ecology and Management* **2001**, 12.
  203. Xiang, X.; Gibbons, S.M.; Yang, J.; Kong, J.; Sun, R.; Chu, H. Arbuscular Mycorrhizal Fungal Communities Show Low Resistance and High Resilience to Wildfire Disturbance. *Plant Soil* **2015**, 397, 347–356, doi:10.1007/s11104-015-2633-z.
  204. Xu, W.; Elberling, B.; Ambus, P.L. Fire Increases Soil Nitrogen Retention and Alters Nitrogen Uptake Patterns among Dominant Shrub Species in an Arctic Dry Heath Tundra. *Science of The Total Environment* **2022**, 807, 150990, doi:10.1016/j.scitotenv.2021.150990.

205. Zaitsev, A.S.; Gongalsky, K.B.; Persson, T.; Bengtsson, J. Connectivity of Litter Islands Remaining after a Fire and Unburnt Forest Determines the Recovery of Soil Fauna. *Applied Soil Ecology* **2014**, *83*, 101–108, doi:10.1016/j.apsoil.2014.01.007.
206. Zhang, N.; Xu, W.; Yu, X.; Lin, D.; Wan, S.; Ma, K. Impact of Topography, Annual Burning, and Nitrogen Addition on Soil Microbial Communities in a Semiarid Grassland. *Soil Science Society of America Journal* **2013**, *77*, 1214–1224, doi:10.2136/sssaj2012.0220.
207. Swallow, M.; Quideau, S.A.; MacKenzie, M.D.; Kishchuk, B.E. Microbial Community Structure and Function: The Effect of Silvicultural Burning and Topographic Variability in Northern Alberta. *Soil Biology and Biochemistry* **2009**, *41*, 770–777, doi:10.1016/j.soilbio.2009.01.014.
208. Sun, Y.; Wu, J.; Shao, Y.; Zhou, L.; Mai, B.; Lin, Y.; Fu, S. Responses of Soil Microbial Communities to Prescribed Burning in Two Paired Vegetation Sites in Southern China. *Ecol Res* **2011**, *26*, 669–677, doi:10.1007/s11284-011-0827-2.
